# Supplementary material
Source: PubMed Central journal article supplement (PMC1142378)
Supplement: pnas_0502121102_1.pdf [file pnas_0502121102_1.pdf]

**Supporting Table 1. Summary of model variables and parameters.**

| Symbol                 | Meaning                                         | Estimate (†)                       | Ref.                    |
|------------------------|-------------------------------------------------|------------------------------------|-------------------------|
| $R$                    | Bead Radius                                     |                                    |                         |
| $h$                    | Gel thickness                                   |                                    |                         |
| $h^*$                  | Gel thickness at symmetry breaking              |                                    |                         |
| $v_p^0$                | Initial gel growth rate                         |                                    |                         |
| $\tau$                 | Time of symmetry breaking                       |                                    |                         |
| $\langle \tau \rangle$ | Average time of symmetry breaking               |                                    |                         |
| $h^s$                  | Stress-limited steady-state thickness           |                                    |                         |
| $h^f$                  | Critical fracture thickness                     |                                    |                         |
| $\lambda$              | Dimensionless parameter $h^s/h^f$               |                                    |                         |
|                        | $\lambda > 1$ : case I                          |                                    |                         |
|                        | $\lambda < 1$ : case II                         |                                    |                         |
| $U^a$                  | Activation energy for crack nucleation          |                                    |                         |
| $k_n$                  | Crack nucleation rate                           |                                    |                         |
| $l^*$                  | Critical crack size                             |                                    |                         |
| $\Delta\tilde{\mu}$    | $kT \ln k_{\text{on}}^b C_a / k_{\text{off}}^p$ |                                    |                         |
| $\sigma$               | Tensile stress at outer surface                 |                                    |                         |
| $\Gamma$               | Fracture energy per unit area                   |                                    |                         |
| $a$                    | Filament length gained per monomer              | 2.7 nm                             | 1                       |
| $k_{\text{on}}^b$      | Barbed end assembly rate constant               | $12 \mu\text{M}^{-1}\text{s}^{-1}$ | 2                       |
| $k_{\text{off}}^p$     | Pointed end disassembly rate constant           | $0.8 \text{ s}^{-1}$               | 2                       |
| $C_a$                  | Steady-state concentration of G-actin           | $0.6 \mu\text{M}$                  | 2                       |
| $\xi$                  | Mesh size of actin gel                          | 50 nm                              | 3                       |
| $E$                    | Elastic modulus of actin gel                    | $10^3\text{-}10^4 \text{ Pa}$      | 4,5                     |
| $l_c$                  | Average distance between crosslinks             | 50 nm                              | 3                       |
| $\epsilon_c$           | Average energy of a crosslink                   | 10 kT                              | 6                       |
| $d$                    | Size of pre-existing crack                      | $0.1 \mu\text{m}$                  | Estimated in this paper |

(†) All parameters (except  $a$ ) depend on the concentrations of the various regulating and crosslinking proteins. Indicated values denote orders of magnitude.

## References

- [1] Holmes, K. C., Popp, D., Gebhard, W. & Kabsch, W. (1990) *Nature* **347**, 44–49.
- [2] Pollard, T. D. (1986) *J. Cell Biol.* **103**, 2747–2754.
- [3] Plastino, J., Lelidis, I., Prost, J., & Sykes, C. (2004) *Eur. Biophys. J.* **33**, 310–320.
- [4] Gerbal, F., Laurent, V., Ott, A., Carlier, M.-F., Chaikin, P., & Prost, J. (2000) *Eur. Biophys. J.* **29**, 134–140.
- [5] Marcy, Y., Prost, J., Carlier, M.-F., & Sykes, C. (2004) *Proc. Natl. Acad. Sci. USA* **101**, 5992–5997.
- [6] Gordon, D., Yang, Y.-Z., & Korn, E. (1976) *J. Biol. Chem.* **251**, 7474–7479.
